# Supplementary material for: Risk of Peripheral Arterial Occlusive Disease with Periodontitis and Dental Scaling: A Nationwide Population-Based Cohort Study
Source: MDPI journal article supplement (doi:10.3390/ijerph191610057), 2022-08-15
Supplement: s1 [file s1]

Supplement Table S1: Disease with relative ICD codes correspond

| Disease                               | International Classification of Diseases, Clinical Modification                                                                         |
|---------------------------------------|-----------------------------------------------------------------------------------------------------------------------------------------|
| Periodontitis                         | 523.4, 523.5, K05.30, K05.31, K05.32, K05.4                                                                                             |
| Peripheral arterial occlusive disease | 443.8, 443.9, 444, I73.81, I73.89, I73.9, I74.01, I74.09, I74.11, I74.2, I74.3, I74.4, I74.5, I74.8, I74.9, I79.1, and I79.8            |
| Hypertension                          | 401-405, and I10-I15                                                                                                                    |
| Hyperlipidemia                        | 272, and E78                                                                                                                            |
| Chronic liver disease                 | 571, K70, K73, K74, K75.4, K75.81, K76.0, K76.89, and K76.9                                                                             |
| Chronic kidney disease                | 585, N184, N185, N186, and N189                                                                                                         |
| Diabetes                              | 250, E10, E11, and E13                                                                                                                  |
| Chronic obstructive pulmonary disease | 491, 492, 496, and J41-J44                                                                                                              |
| Rheumatoid arthritis                  | 714.0, M05, and M06                                                                                                                     |
| Ankylosing spondylitis                | 720.0, M45, and M46                                                                                                                     |
| Hepatitis B                           | 070.2, 070.3, V02.61, B16.0, B16.1, B16.2, B16.9, B18.0, B18.1, B19.10, 111 B19.11, and Z22.51                                          |
| Hepatitis C                           | 070.41, 070.44, 070.51, 070.54, 070.7, 112 V02.62, B17.10, B17.11, B18.2, B19.20, B19.21, and Z22.52                                    |
| Herpes zoster                         | 053, and B02                                                                                                                            |
| Psoriasis                             | 696.1, 696.2, 696.3, 696.4, 696.5, L40.0-L40.4, 114 L40.8, L40.9, L41.0, L41.1, L41.3-L41.5, L41.8, L41.9, L94.5, L42, L44.0, and L30.5 |

\* ICD: International Classification of Diseases
